# Supplementary material for: PD-L1/PD-1 expression and tumor-infiltrating lymphocytes in conjunctival melanoma
Source: PubMed Central journal article supplement (PMC5589616; doi:10.18632/oncotarget.18039), 2017-05-20
Supplement: oncotarget-08-54722-s001.pdf [file oncotarget-08-54722-s001.pdf]

# PD-L1/PD-1 expression and tumor-infiltrating lymphocytes in conjunctival melanoma

## SUPPLEMENTARY MATERIALS

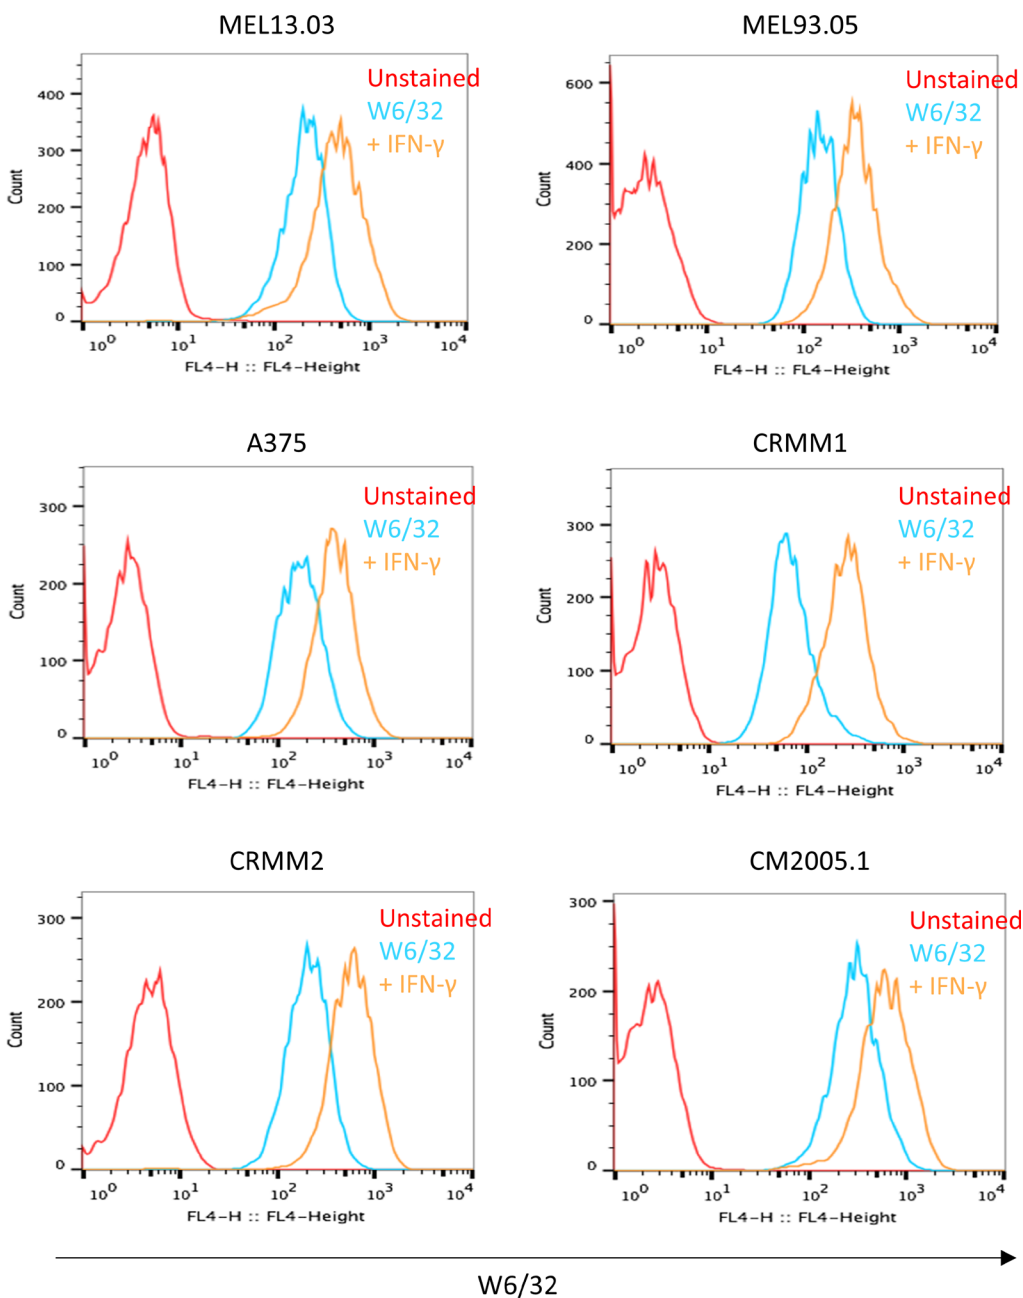

**Supplementary Figure 1:** The confirmation of IFN-γ effect on cutaneous (MEL13.03, MEL93.05 and A375) and conjunctival melanoma (CRMM1, CRMM2 and CM2005.1) cell lines using the anti-human HLA-A, B, C antibody (W6/32). The cells were treated with IFN-γ (100 IU/ml) for 48 h. Histograms with red, blue and brown line represent unstained, W6/32 expression, and the effect of IFN-γ stimulation on W6/32, respectively.

**Supplementary Table 1: Correlation between different infiltrating immune cells (T cells and macrophages)**

|                                                      |          | CD3 <sup>+</sup> CD8 <sup>+</sup> | CD3 <sup>+</sup> CD8 <sup>-</sup> | CD3 <sup>+</sup> CD8 <sup>-</sup> Foxp3 <sup>-</sup> | CD3 <sup>+</sup> CD8 <sup>-</sup> Foxp3 <sup>+</sup> | CD68  | CD68 <sup>+</sup> CD163 <sup>+</sup> |
|------------------------------------------------------|----------|-----------------------------------|-----------------------------------|------------------------------------------------------|------------------------------------------------------|-------|--------------------------------------|
| CD3                                                  | <i>r</i> | 0.84                              | 0.95                              | 0.88                                                 | 0.84                                                 | 0.63  | 0.48                                 |
|                                                      | <i>P</i> | < 0.001                           | < 0.001                           | < 0.001                                              | < 0.001                                              | 0.001 | 0.01                                 |
| CD3 <sup>+</sup> CD8 <sup>+</sup>                    | <i>r</i> |                                   | 0.69                              | 0.63                                                 | 0.57                                                 | 0.59  | 0.46                                 |
|                                                      | <i>P</i> |                                   | < 0.001                           | 0.001                                                | 0.002                                                | 0.001 | 0.02                                 |
| CD3 <sup>+</sup> CD8 <sup>-</sup>                    | <i>r</i> |                                   |                                   | 0.93                                                 | 0.84                                                 | 0.53  | 0.38                                 |
|                                                      | <i>P</i> |                                   |                                   | < 0.001                                              | < 0.001                                              | 0.005 | 0.053                                |
| CD3 <sup>+</sup> CD8 <sup>-</sup> Foxp3 <sup>-</sup> | <i>r</i> |                                   |                                   |                                                      | 0.65                                                 | 0.51  | 0.34                                 |
|                                                      | <i>P</i> |                                   |                                   |                                                      | < 0.001                                              | 0.01  | 0.09                                 |
| CD3 <sup>+</sup> CD8 <sup>-</sup> Foxp3 <sup>+</sup> | <i>r</i> |                                   |                                   |                                                      |                                                      | 0.49  | 0.46                                 |
|                                                      | <i>P</i> |                                   |                                   |                                                      |                                                      | 0.01  | 0.02                                 |
| CD68                                                 | <i>r</i> |                                   |                                   |                                                      |                                                      |       | 0.87                                 |
|                                                      | <i>P</i> |                                   |                                   |                                                      |                                                      |       | < 0.001                              |

*r* = two-tailed Spearman correlation coefficient, with 26 observations. *P* ≤ 0.05 are in italics.

**Supplementary Table 2: Secondary antibodies used in IF**

| Antibody       | Specificity | Isotype | Company           | Catalogue number | Dilutions |
|----------------|-------------|---------|-------------------|------------------|-----------|
| AlexaFluor 488 | mouse       | IgG     | Life Technologies | A-11001          | 1:300     |
| AlexaFluor 546 | rabbit      | IgG     | Life Technologies | A-11010          | 1:300     |
| AlexaFluor 488 | goat        | IgG     | Life Technologies | A-11055          | 1:300     |
| AlexaFluor 488 | rabbit      | IgG     | Life Technologies | A-11034          | 1:300     |
| AlexaFluor 546 | mouse       | IgG2b   | Life Technologies | A-21143          | 1:300     |
| AlexaFluor 647 | mouse       | IgG1    | Life Technologies | A-21240          | 1:300     |
| AlexaFluor 488 | mouse       | IgG2a   | Life Technologies | A-21131          | 1:300     |
| AlexaFluor 546 | mouse       | IgG1    | Life Technologies | A-21123          | 1:300     |
| AlexaFluor 647 | mouse       | IgG2a   | Life Technologies | A-21241          | 1:300     |
| AlexaFluor 488 | mouse       | IgG1    | Life Technologies | A-21121          | 1:300     |
